# Supplementary material
Source: PubMed Central journal article supplement (PMC2742872)

**Supplemental Fig. 1. Intracellular dynamics of lipoxygenase localization in resident peritoneal macrophages.** Peritoneal exudates from 12/15-LO<sup>+/-</sup> 5-LO<sup>+/-</sup> mice were either fixed directly or incubated with CaCl<sub>2</sub> and ionophore A23187 for 5 min prior to fixation. Immunodetection of 12/15-LO, 5-LO, and CD68 was performed, followed by mounting in Pro-Long Antifade GOLD containing DAPI. **A-B**, 12/15-LO<sup>+</sup> cells (green) co-localize with CD68<sup>+</sup> cells. Activation by ionophore does not cause substantial redistribution of 12/15-LO from the cytoplasmic compartment with only slight accumulation at nuclear (**A, B**) and some cytoplasmic (**B**) membranes. **C-D**, Upon ionophore treatment, 5-LO staining forms a punctate pattern inside the nucleus and at the nuclear envelope (**D**). Representative of at least 3 independent experiments. Scale bar, 25  $\mu$ m.

**Supplemental Fig. 2. Analysis of peritoneal lavage cells.** Peritoneal exudates were analysed for specific M $\Phi$  (CD11b, F4/80) and B lymphocyte (B220) antigens. A gate was set around live cells based on propidium iodide staining of dead cells (not shown). **A-B**, Representative dot plots of lavage cells. **A**, Percentages of CD11b<sup>+</sup> F4/80<sup>+</sup> M $\Phi$  in the top right quadrant (Q2) are given for each genotype. **B**, Dual staining for F4/80<sup>+</sup> M $\Phi$  (top left quadrant Q1) and B220<sup>+</sup> B cells (lower right quadrant Q4), percentages are given. **C**, Averaged percentages (mean  $\pm$  S.E.M.) of CD11b<sup>+</sup> F4/80<sup>+</sup> M $\Phi$ , of n = 5 independent determinations per genotype. **D**, Averaged percentages of B220<sup>+</sup> B cells, of n = 3-5 independent determinations per genotype.

# Supplemental Fig. 1

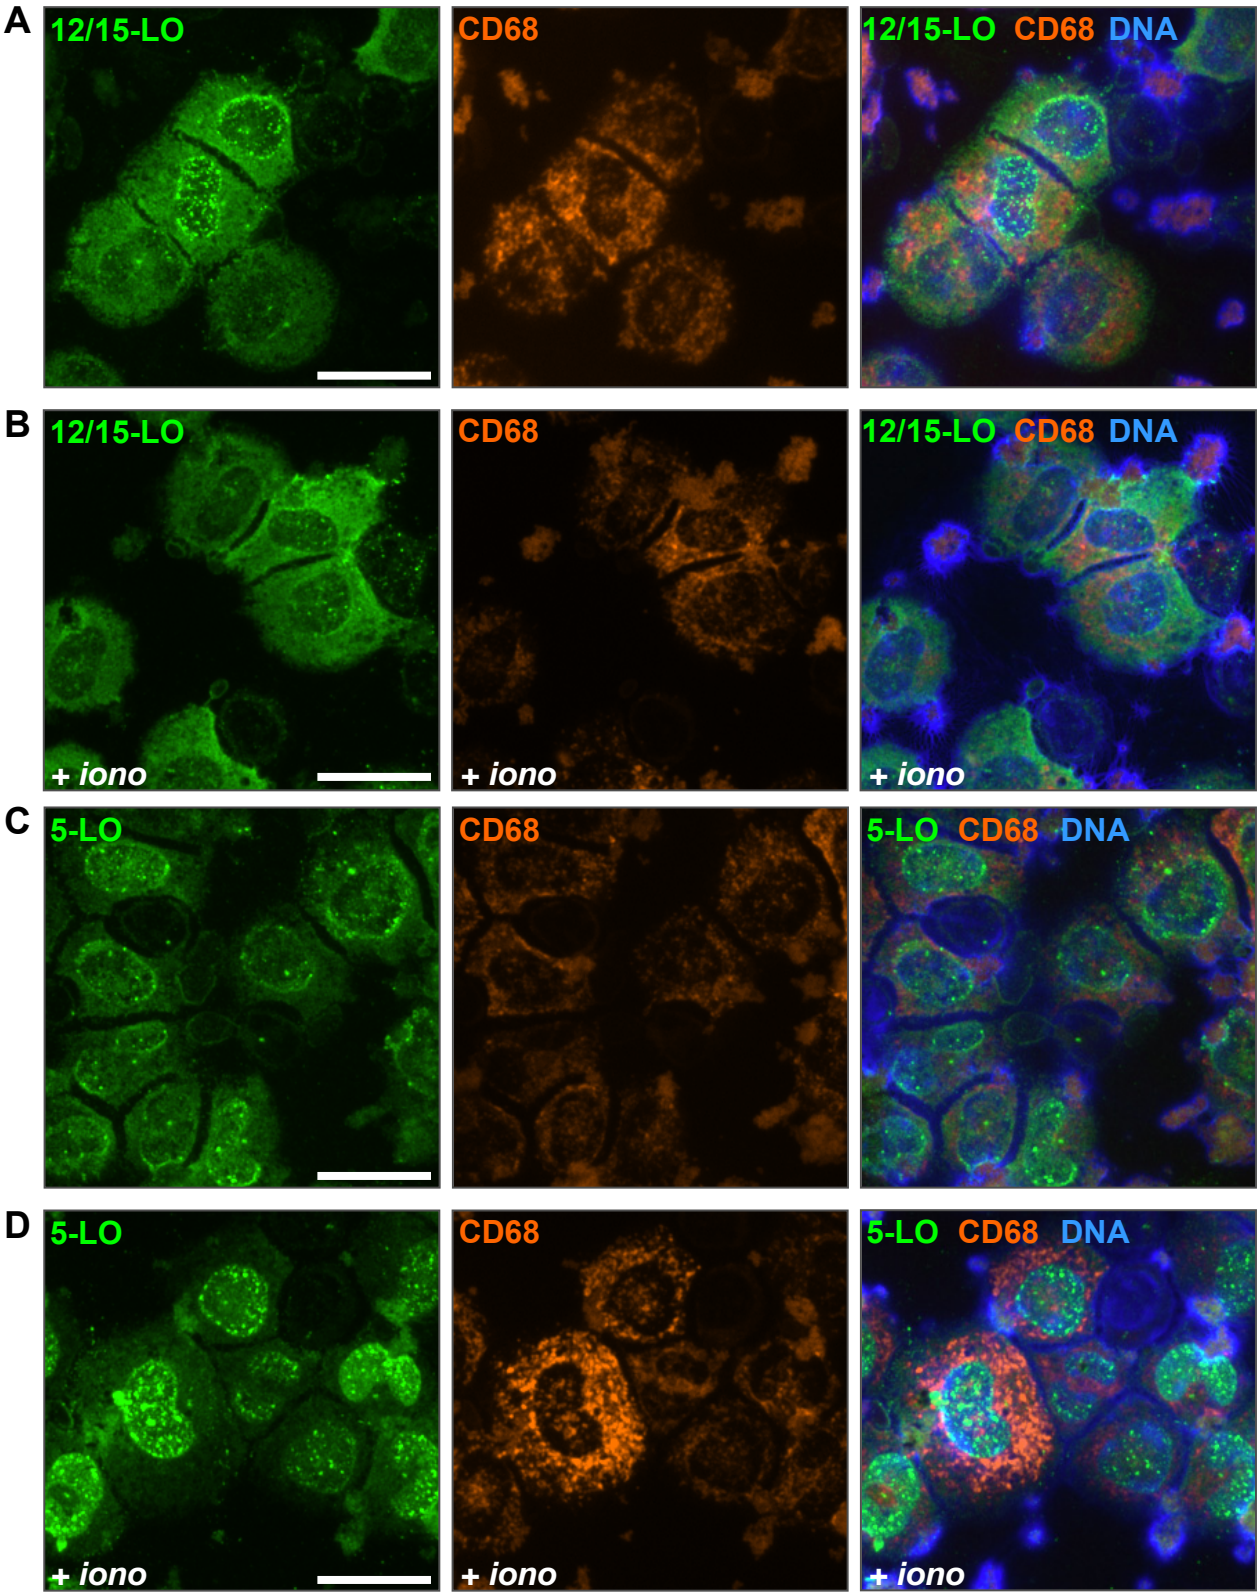

# Supplemental Fig. 2

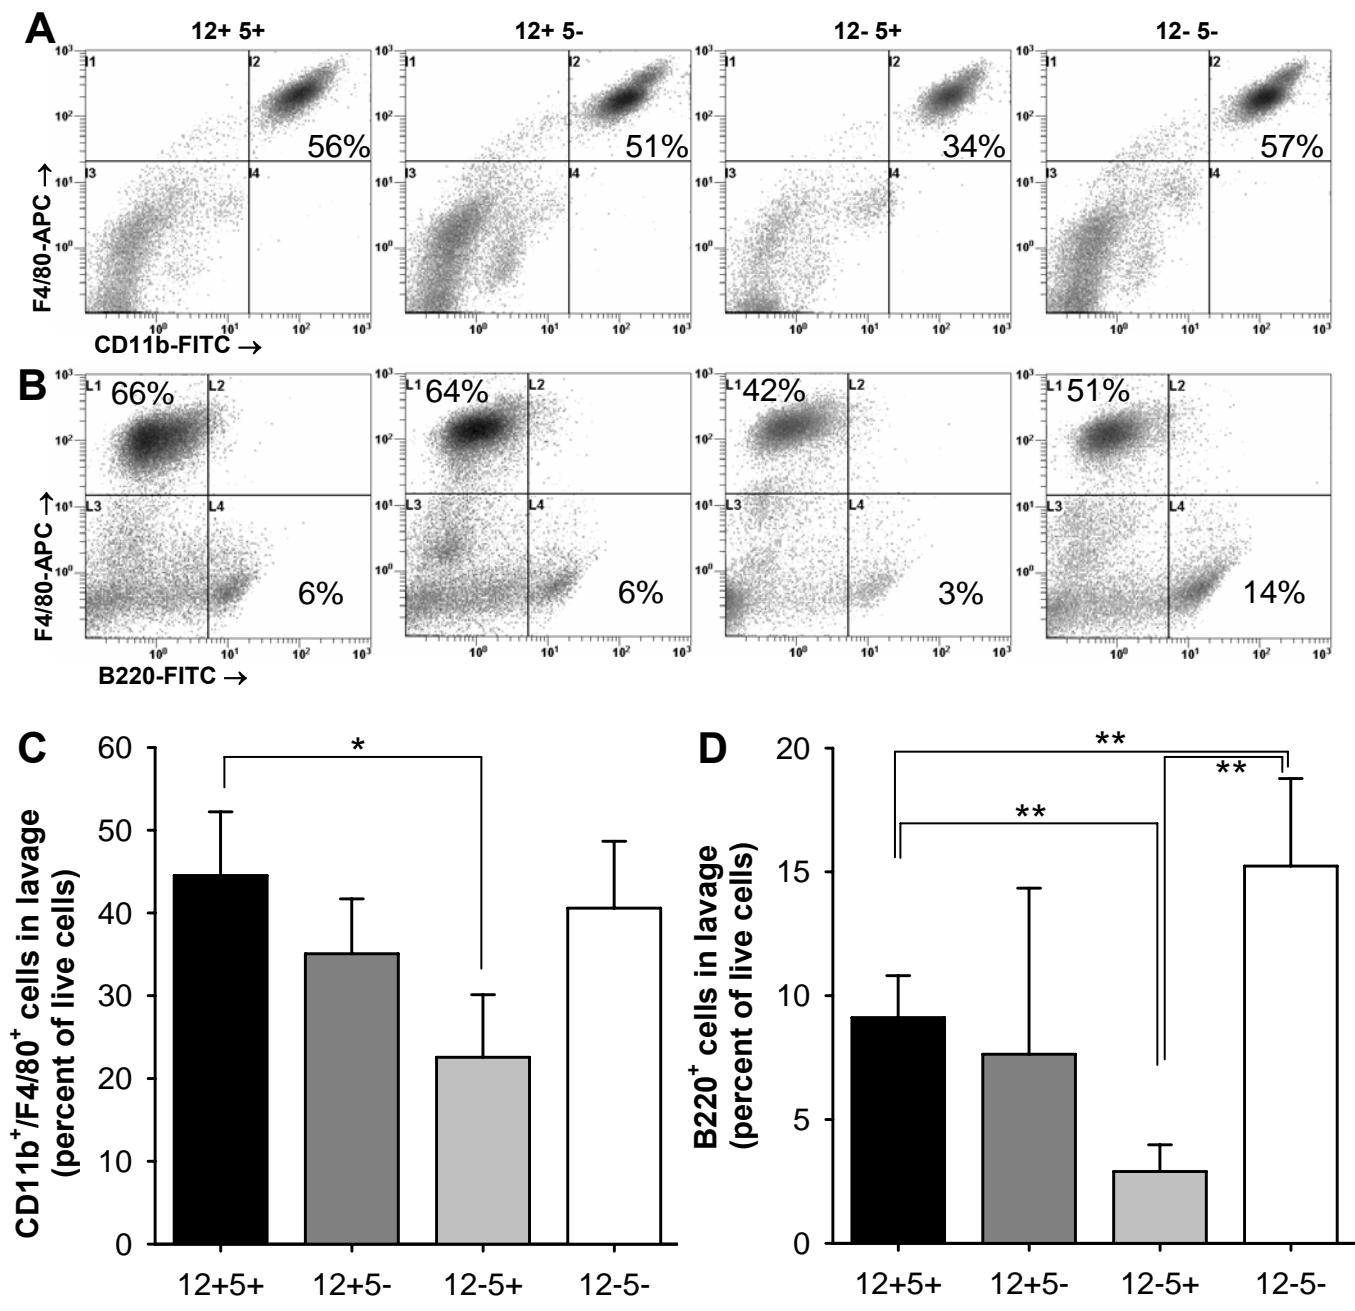

Supplement: supp_M109.000901_jbc.M109.000901-1.pdf [file supp_M109.000901_jbc.M109.000901-1.pdf]
